# Supplementary material for: Zika Virus Infection Induces Acute Kidney Injury Through Activating NLRP3 Inflammasome Via Suppressing Bcl-2
Source: Front Immunol. 2019 Aug 14;10:1925. doi: 10.3389/fimmu.2019.01925 (PMC6702322; doi:10.3389/fimmu.2019.01925)
Supplement: Supplementary file 1 [file Data_Sheet_1.pdf]

## Supplemental Figures and Legends

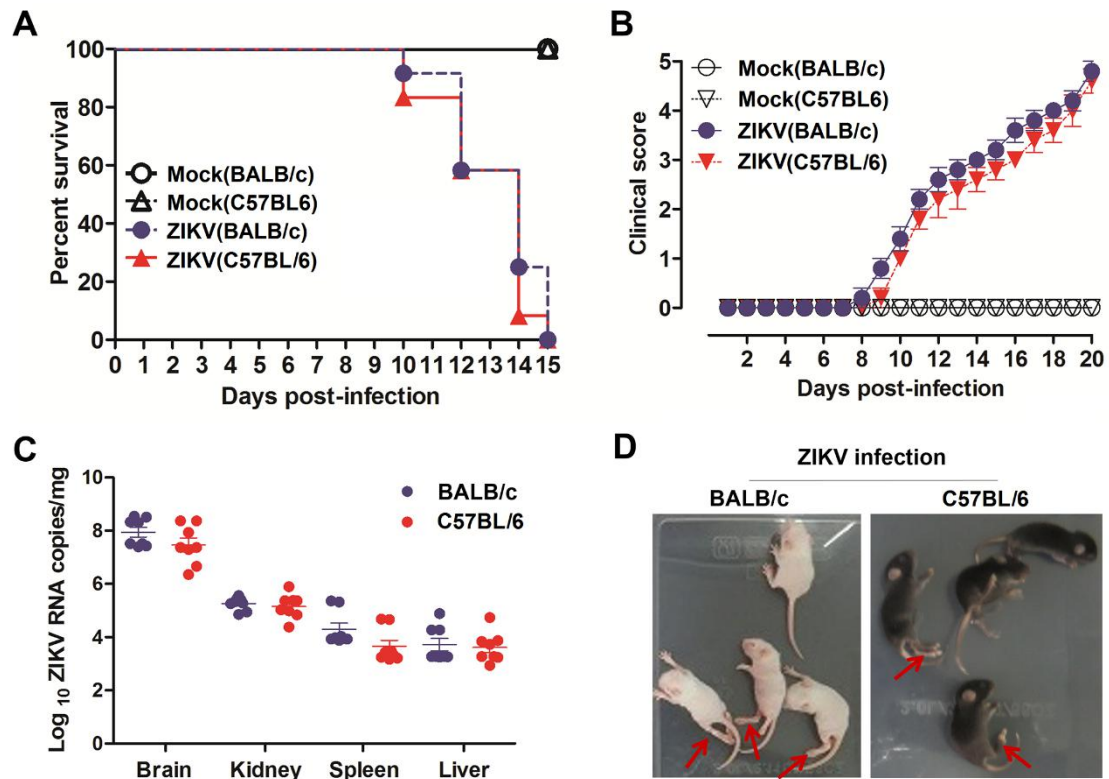

**Supplemental Figure 1. Establishment of ZIKV-infected BALB/c and C57BL/6 newborn mouse model.** One- or two-day-old mice were infected with ZIKV ( $10^5$  PFU) by intraperitoneal injection. **(A)** Lethality was monitored for 15 days in the BALB/c and C57BL/6 newborn mice infected with ZIKV. **(B)** The clinical scores of uninfected (mock) and ZIKV-infected BALB/c or C57BL/6 mice were recorded over 15 days. Clinical scores were scored as follows: 0: healthy, 1: body weight loss, 2: unsteady gait, 3: severe ataxia, 4: paralysis, and 5: death. **(C)** Viral RNA copies in whole brain, kidney, spleen, and liver tissues were determined by qRT-PCR analysis at 10 days post-infection. **(D)** Macroscopic photos revealed the severe paralysis in ZIKV-infected BALB/c and C57BL/6 newborn mice at 10 days post-infection, the red arrows indicated the paralysis legs. N = 6 mice/group.

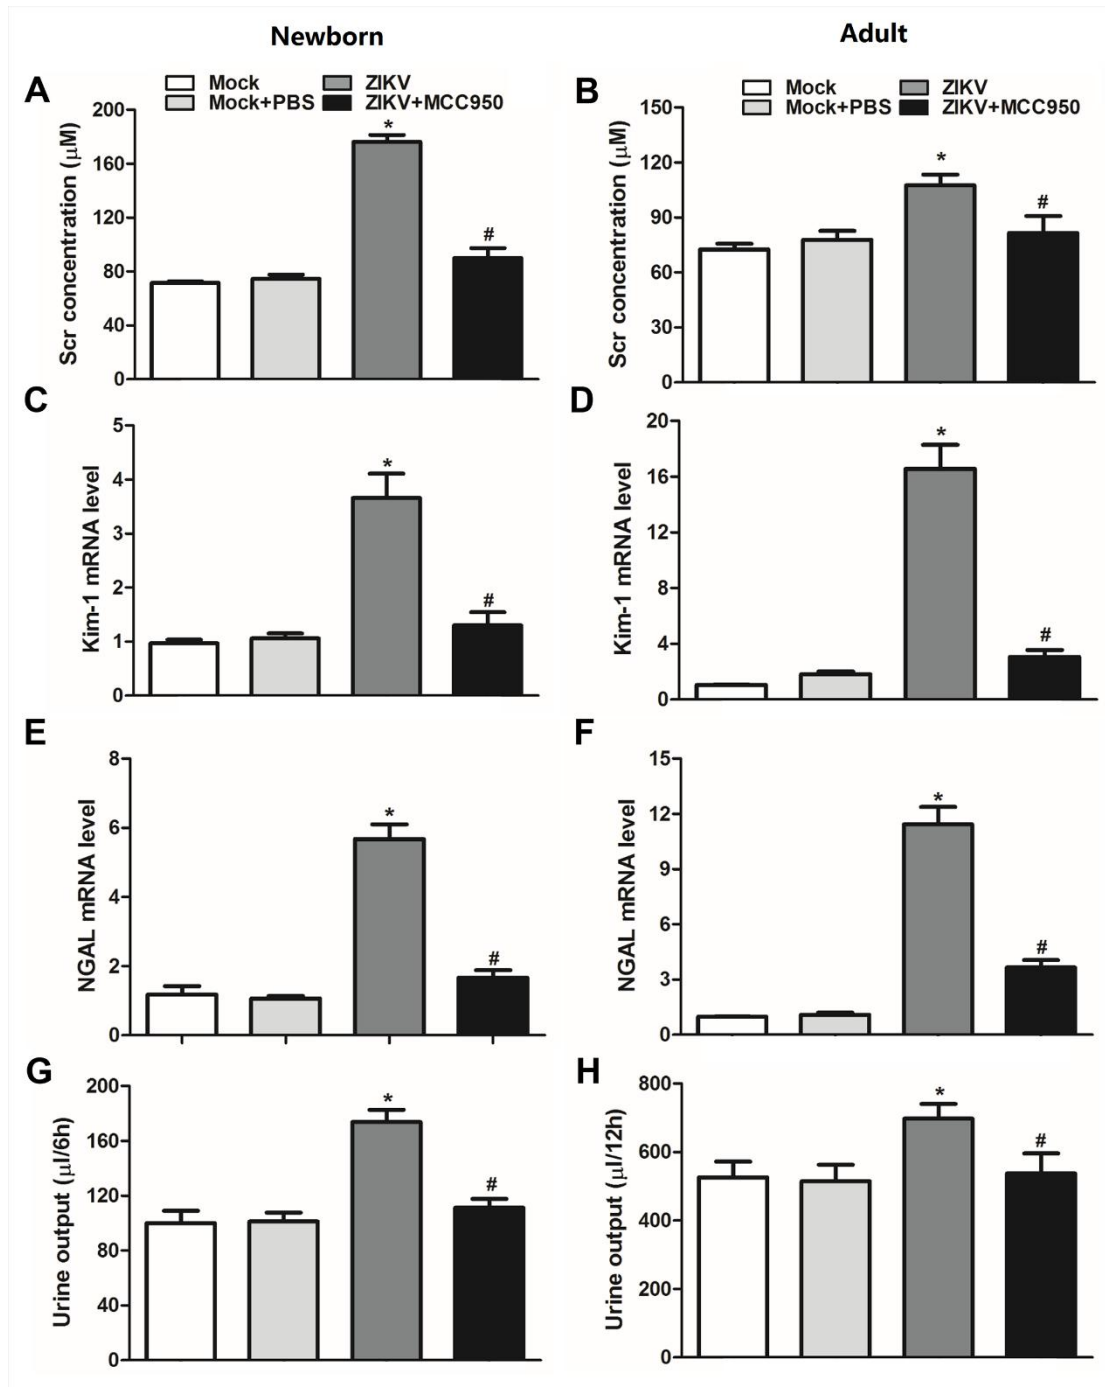

**Supplemental Figure 2. The inhibition of NLRP3 inflammasome attenuated ZIKV-induced acute kidney injury in mice.** Serum creatinine (Scr) concentration was tested in newborn mice (**A**) at 10 days post-infection and in adult mice (**B**) at 7 days post-infection using a creatinine assay kit. (**C-F**) The relative mRNA levels of KIM-1 (**C-D**) and NGAL (**E-F**) were determined in the kidneys of newborn mice (**E**)

at 10 days post-infection and adult mice (F) at 7 days post-infection by qRT-PCR. (G-H) Urine output was measured for 6 h in newborn mice (G) and 12 h for adult mice (H). N = 6 mice/group. (\* $p$  < 0.05 vs mock group; # $p$  < 0.05 vs ZIKV group).

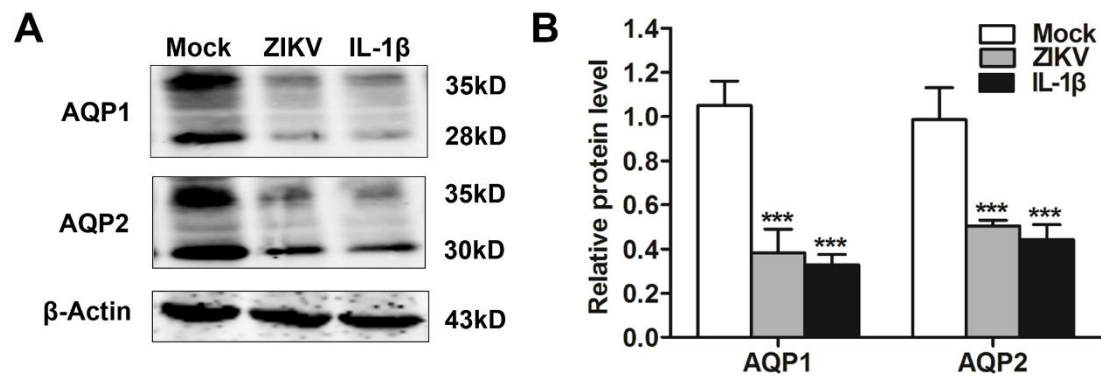

**Supplemental Figure 3. IL-1β decreased the expression of aquaporins in renal cells.** (A-B) The primary murine renal epithelial cells were obtained from 7-day-old newborn mice and incubated with ZIKV (MOI=2) or treated with IL-1β (5 ng/ml) for 24 h. Then the expression of AQP1 and AQP2 in the mock or ZIKV-infected or IL-1β treated renal cells were assessed by western blot. (\*\*\*) $p$  < 0.001 vs. mock group).

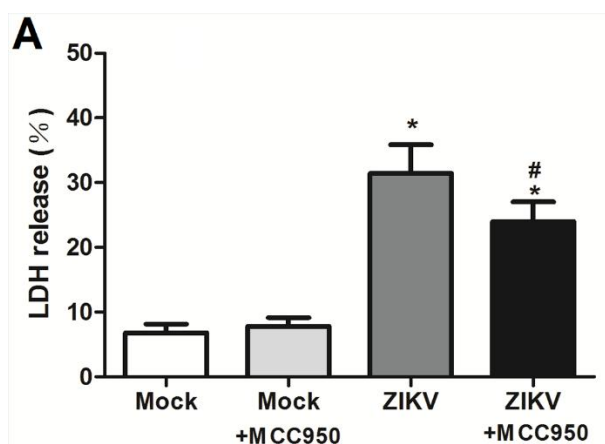

**Supplemental Figure 4. The inhibition of NLRP3 inflammasome activation slightly suppressed ZIKV infection-induced cell death.** HK-2 cells were pre-treated with MCC950 (10 μM) for 30min followed by incubation with PBS (mock group) or

ZIKV (MOI=2), and cultured with complete medium in presence of MCC950 or PBS at 37 °C for 24 h. **(A)** Cell supernatants and lysate were collected to analyze cell death by Lactate dehydrogenase (LDH) assay, using CytoTox 96 Non-Radioactive Cytotoxicity Assay Kit (Promega, Madison, WI, USA). Data were presented as mean  $\pm$  SEM, \* $p$  < 0.05 vs mock group; # $p$  < 0.05 vs ZIKV group.

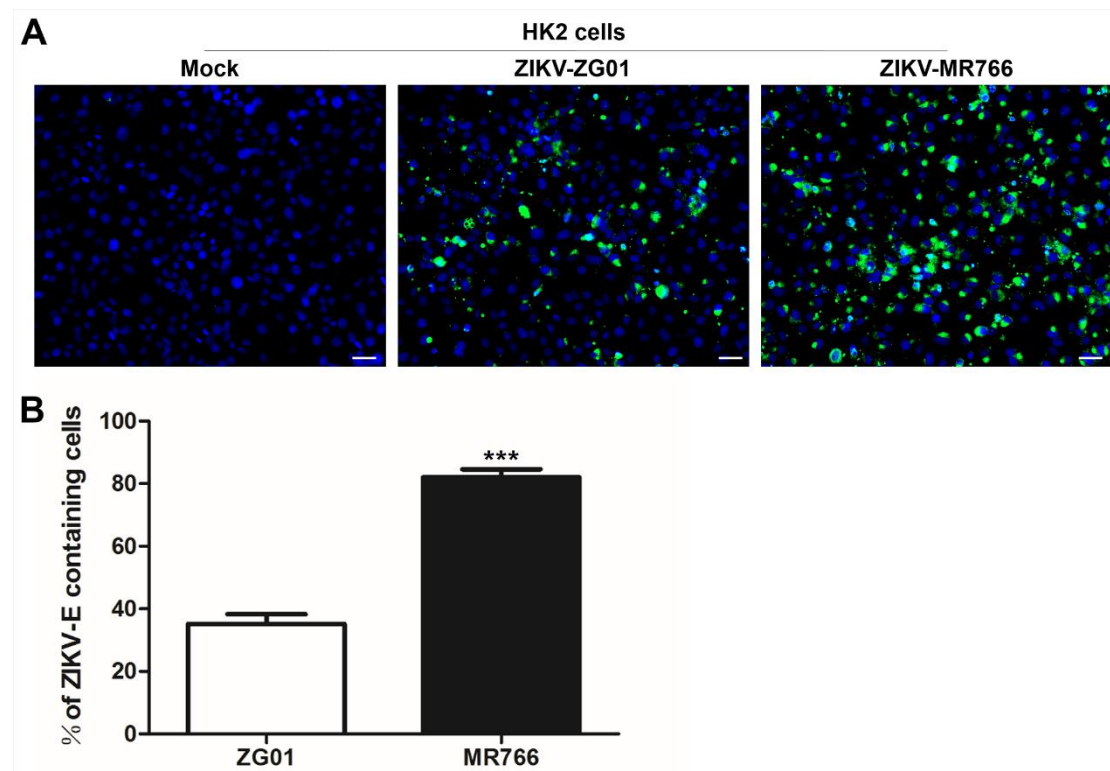

**Supplemental Figure 5. HK-2 cells were more susceptible with African strain-MR766 than Asian strain-ZG01. (A-B)** HK-2 cells were infected with ZG01 (Asian strain) and MR766 (African strain) (MOI=2) for 24 h, stained with DAPI to label nuclei (blue) and an antibody against ZIKV E protein (green), examined by confocal microscopy (A), Scale bars, 40  $\mu$ m. The percentage of ZIKV-E protein-positive cells was calculated by image J. (\*\*\*) $p$  < 0.001 vs. mock group).
